# Supplementary material
Source: publisher site journal article supplement (https://www.dovepress.com/article/589432)
Supplement: Supplementary file 1 [file 589432_Appendix.docx]

**Appendix 1. The SPIDER framework guided the research question and eligibility criteria**

| Component | Description and Search Terms |
| --- | --- |
| S – Sample | Children, adolescents, and youths diagnosed with attention-deficit/hyperactivity disorder; parents, caregivers, and families; Taiwan or Taiwanese population |
| PI – Phenomenon of Interest | Medication adherence, compliance, persistence, drug taking behaviors, treatment initiation, treatment delay, discontinuation, and continuation |
| D – Design | Observational studies, cohort studies, cross-sectional studies, database studies, surveys, questionnaires, interviews, focus groups, and mixed-methods research |
| E – Evaluation | Factors, determinants, predictors, barriers, attitudes, beliefs, perceptions, knowledge, family support, stress, motivation, stigma, parental pressure, and psychosocial/behavioral factors affecting adherence |
| R – Research Type | Quantitative, qualitative, and mixed-methods studies |

**Appendix 2. Literature search strategy**

Database: PubMed

Date of Search: November 20, 2025

Search String:

("Attention Deficit Disorder with Hyperactivity"[Mesh] OR ADHD OR "attention deficit")

AND

(child* OR adolescent* OR youth OR parent* OR caregiver* OR family)

AND

("medication adherence" OR compliance OR persistence OR "drug taking" OR "treatment initiation" OR "treatment delay" OR discontinuation OR initiation OR continuation)

AND

(interview* OR "focus group*" OR survey OR questionnaire OR "mixed method*" OR qualitative OR observational OR cohort OR "database study" OR "cross-sectional")

AND

(attitude* OR belief* OR perception* OR knowledge OR "family support" OR stress OR barrier* OR motivation* OR stigma OR factor* OR determinant* OR predictor*)AND (Taiwan OR Taiwanese)

**Appendix 3. Study screening and selection overview**

**
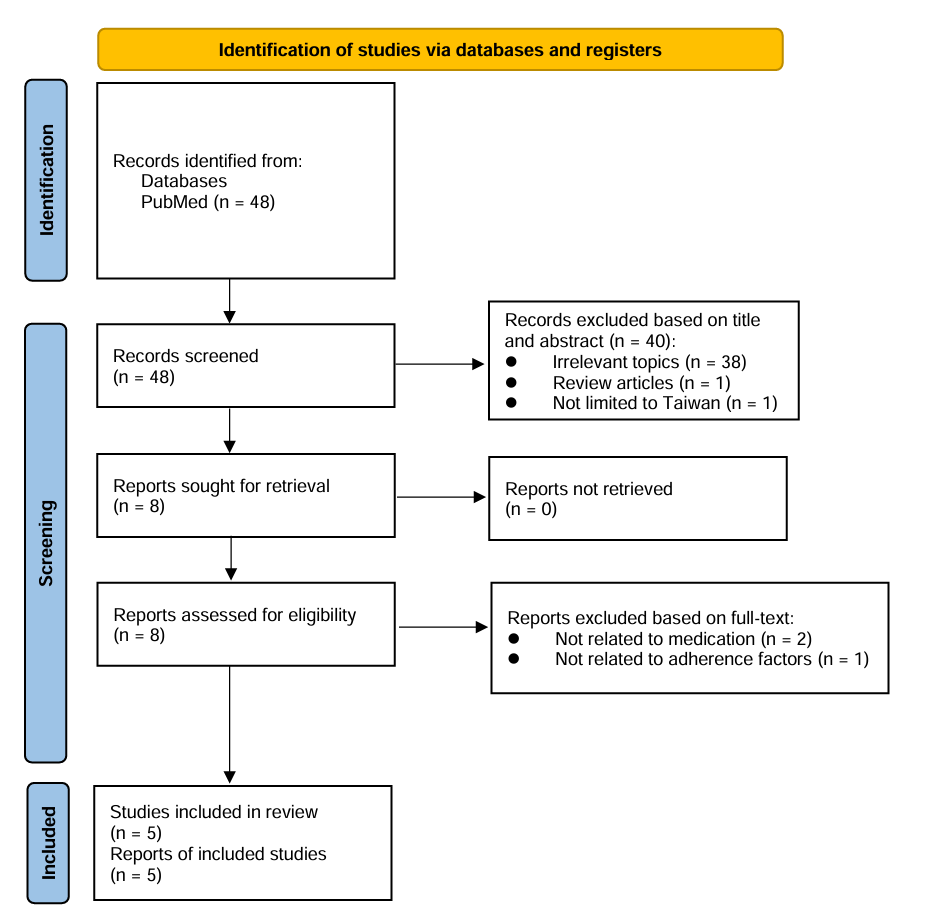
**
